# Supplementary material for: Additional annotation enhances potential for biologically-relevant analysis of the Illumina Infinium HumanMethylation450 BeadChip array
Source: PubMed Central journal article supplement (PMC3740789; doi:10.1186/1756-8935-6-4), 2013-03-03

# Distribution of DNA methylation

**cg06961873**

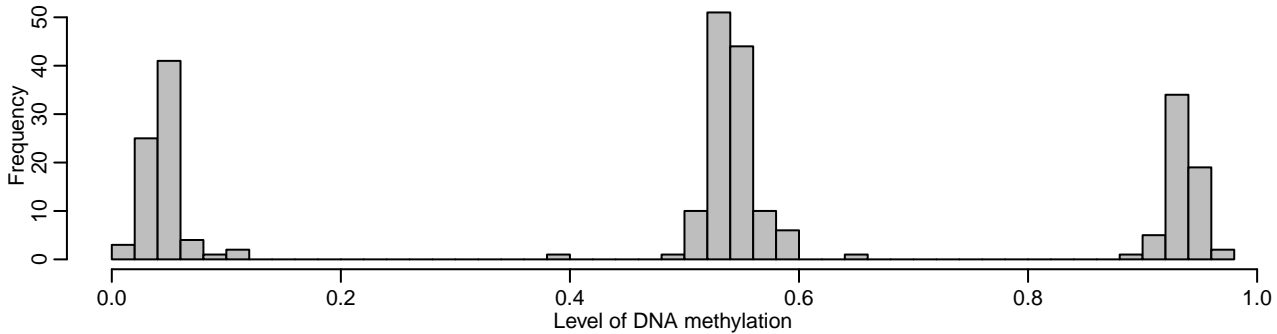

**cg25593194**

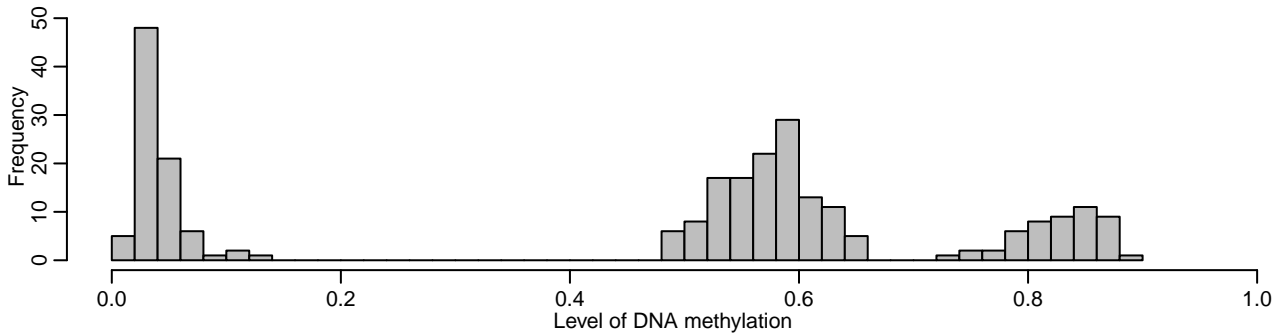

**cg16908938**

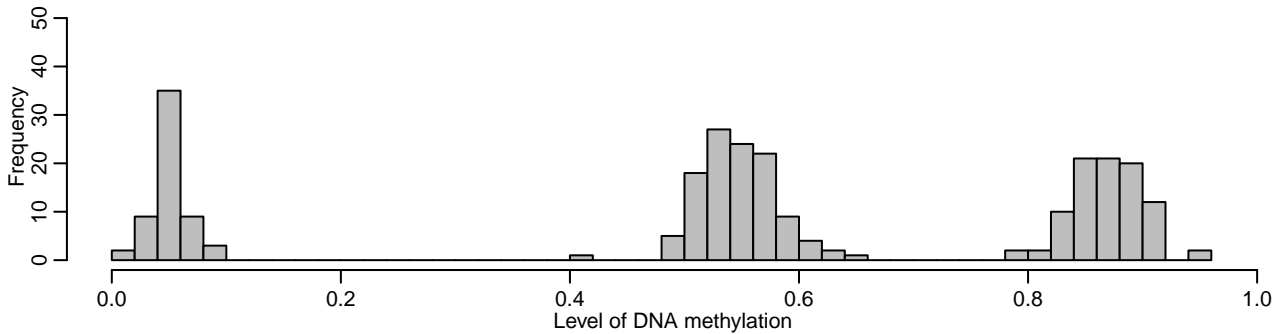

Supplement: 1756-8935-6-4-S3.pdf [file 1756-8935-6-4-S3.pdf]
