# Supplementary material for: Additional annotation enhances potential for biologically-relevant analysis of the Illumina Infinium HumanMethylation450 BeadChip array
Source: PubMed Central journal article supplement (PMC3740789; doi:10.1186/1756-8935-6-4), 2013-03-03
Supplement: 1756-8935-6-4-S5.pdf [file 1756-8935-6-4-S5.pdf]

A

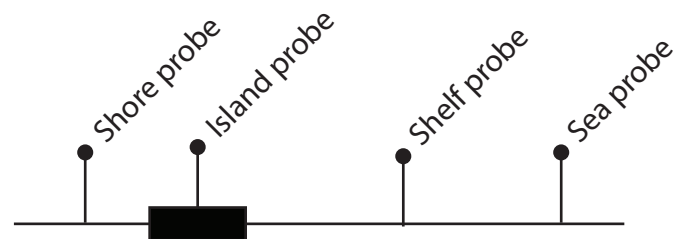

B

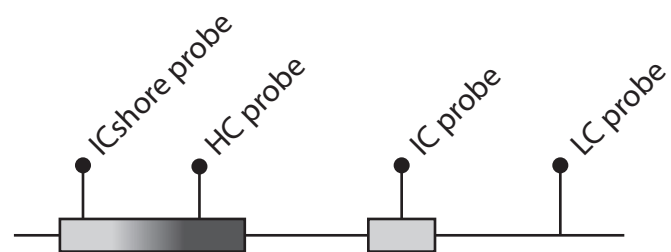

- UCSC Island
- Intermediate density CpG island (IC)
- High density CpG island (HC)
