# Supplementary material for: Additional annotation enhances potential for biologically-relevant analysis of the Illumina Infinium HumanMethylation450 BeadChip array
Source: PubMed Central journal article supplement (PMC3740789; doi:10.1186/1756-8935-6-4), 2013-03-03

# Distribution of DNA methylation in chorionic villi

## Illumina CpG classes

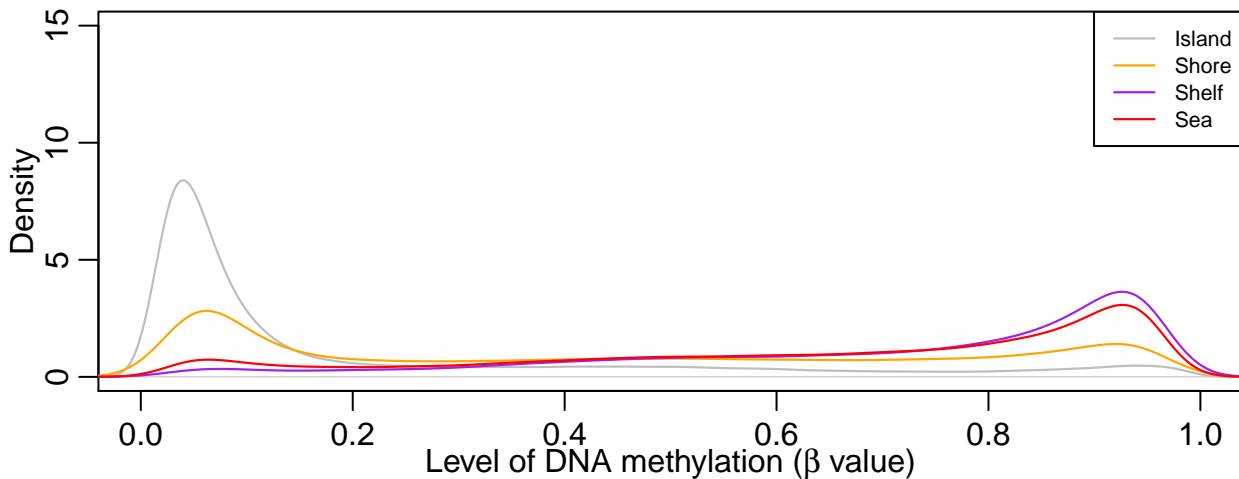

## HIL CpG classes

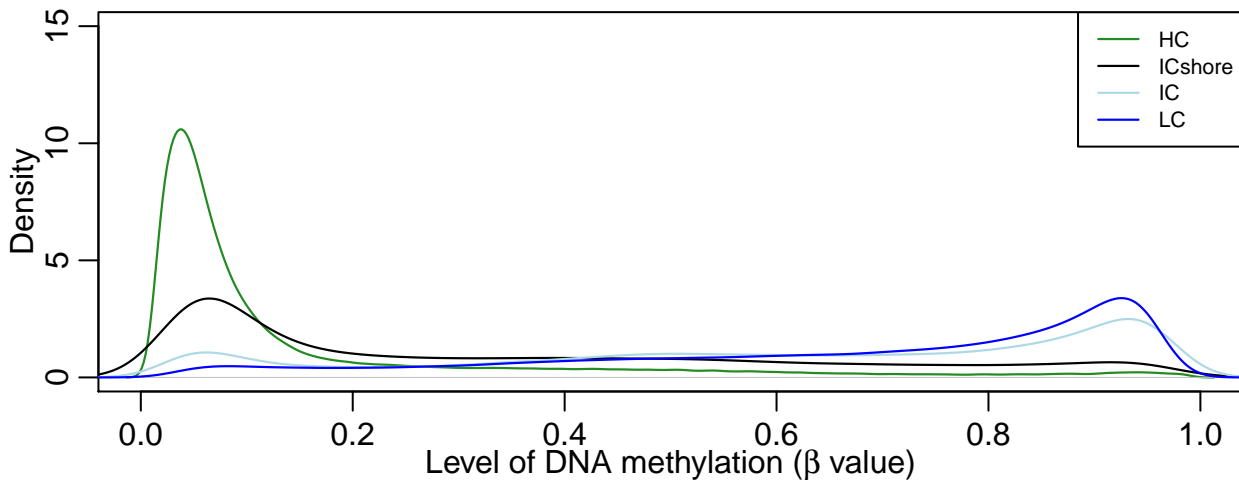

Supplement: 1756-8935-6-4-S9.pdf [file 1756-8935-6-4-S9.pdf]
